# Supplementary material for: Association of plasma PCB levels and HbA1c concentration in Iran
Source: J Occup Med Toxicol. 2018 May 31;13:18. doi: 10.1186/s12995-018-0199-4 (PMC5984357; doi:10.1186/s12995-018-0199-4)
Supplement: Supplementary file 1 — PCB_DM_data. (XLSX 55 kb) [file 12995_2018_199_MOESM1_ESM.xlsx]

## Sheet: PCB DM data, 2017-02-16 sub
code	Sex	age	group	LDL	HDL	TG	TotalChol	TotalLipid	Residenceyplace	ResidencyPeriod	Origin	Company	WorkingType	mainjobtask	duration	formeroccupation	duration2	currentdiseases	currentmedicaltreatment	height	weight	BMI	SeaFood	FatDiet	FBS	HbA1c	metabolic	type2DM	PCB28	PCB52	PCB101	PCB153	PCB153Q	PCB138	PCB138Q	PCB180	PCB180Q	PCBSum	PCBsumQ	Volume	PCB118	PCB118Q	PCB105	PCB167	PCB156	PCB74	PCB66	PCB99	PCB28gr
141	1	60	2	85	36	105	142	427.963	1	540	1	6	1	Driving	456		#NULL!	DM	Metformin	168	84	29.7619	2	2	105	5.7	1	0	0.005	0.005	0.005	0.157185	4	0.105339	4	0.172627	4	0.450151	4	2	0.0162995	3	0.005	0.005	0.0191892	0.005	0.005	0.005	1
116	1	70	2	69	34	118	126.6	406.005	1	840	8	6	1		480		#NULL!	HTN, Renal Failure	Enalapril, Losartan, Propranolol	169	67	23.4586	2	1	103	6.3	1	0	0.005	0.005	0.005	0.0931143	4	0.0497258	4	0.143616	4	0.301457	4	2	0.005	1	0.005	0.005	0.0119573	0.005	0.005	0.005	1
16	1	49	1	59	32	378	166.6	756.805	2	480	8	1	0	Filling & Packing of paints	264		#NULL!			183	97	28.9647	1	3	409	10.3	1	1	0.005	0.005	0.005	0.169899	4	0.0966886	4	0.131823	4	0.413411	4	0.8	0.005	1	0.005	0.005	0.005	0.005	0.005	0.005	1
17	1	51	1	141	56	217	240.4	763.331	1	588	8	1	0	Filling paint sprayer	252	Textile Painting	84	Psoriasis	Local Oint	180	82	25.3086	2	2	81	5.7	1	0	0.005	0.005	0.005	0.126603	4	0.0861337	4	0.111942	4	0.339679	4	1	0.005	1	0.005	0.005	0.005	0.005	0.005	0.005	1
129	1	62	2	170	37	291	265.2	893.627	1	528	25	6	0	Teaching	360		#NULL!	Hyperthyroidism	Levothyroxine	175	85	27.7551	2	1	100	6	1	0	0.005	0.005	0.005	0.13874	4	0.0940098	4	0.109943	4	0.357693	4	2	0.0246348	4	0.005	0.005	0.013753	0.005	0.005	0.005	1
123	0	71	2	68	58	85	143	410.233	1	840	1	6	1		#NULL!		#NULL!	DM, HTN, HLP	Insulin, Metformin, Atorvastatine, ASA, Losartan	168	65	23.03	1	1	334	13	1	1	0.005	0.005	0.005	0.124588	4	0.0783387	4	0.100127	4	0.318053	4	2	0.0421901	4	0.005	0.005	0.010333	0.005	0.005	0.0105164	1
189	1	59	2	51	28	389	156.8	745.559	1	456	3	6	1	Managing of restaurant	360		#NULL!	DM	Metformin	170	88	30.4498	1	3	109	6.6	1	1	0.005	0.005	0.005	0.0614198	4	0.0401205	4	0.0849709	4	0.201511	4	1.6	0.0135184	2	0.005	0.005	0.005	0.005	0.005	0.005	1
138	1	43	2	144	39	269	236.8	807.159	1	168	14	6	0	Cleaning of office	144		#NULL!	Anxiety	Sertraline	170	90	31.1419	1	3	95	6	1	0	0.005	0.005	0.005	0.152107	4	0.170783	4	0.0792698	4	0.41716	4	2	0.0681835	4	0.0163275	0.005	0.0177518	0.0144047	0.005	0.0249328	1
1	1	39	1	130	64	168	227.6	685.275	1	468	8	1	1	Office Work	72	Office Work	24			170	80	27.6817	1	3	99	6	1	0	0.005	0.005	0.005	0.0976516	4	0.0709798	4	0.0712645	4	0.254896	4	0.9	0.005	1	0.005	0.005	0.005	0.005	0.005	0.005	1
11	1	50	1	90	40	200	170	586.523	3	300	1	1	0	Filling & Packing of paints	252		#NULL!			165	64	23.5078	1	2	77	4.7	0	0	0.005	0.005	0.005	0.0639973	4	0.0366974	3	0.0693264	4	0.185021	4	1	0.005	1	0.005	0.005	0.005	0.005	0.005	0.005	1
21	1	42	1	112	47	126	184.2	544.757	1	504	8	1	1	Office Work	12	Office Work	180			180	90	27.7778	2	2	100	5.7	1	0	0.005	0.005	0.005	0.0759641	4	0.0610202	4	0.0645507	4	0.216535	4	1	0.005	1	0.005	0.005	0.005	0.005	0.005	0.005	1
87	1	36	1	96	41	177	172.4	568.971	6	432	8	5	0	Repairing of Transformators	96	Electrical Network Maintenance	120	Allergy	Cetirizine	176	74	23.8895	1	2	83	5.4	0	0	0.013352	0.005	0.005	0.150977	4	0.154144	4	0.0642487	4	0.392722	4	2	0.109393	4	0.029897	0.0150585	0.0171188	0.0184821	0.0129319	0.022907	2
96	1	44	1	115	40	125	180	534.223	5	456	8	5	0	Low Voltage Networks Maintenance	24	Electricity Meter installation	156	Hyperthyroidism		167	69	24.7409	1	3	78	5.8	1	0	0.005	0.005	0.005	0.0568364	4	0.0296908	3	0.0610138	4	0.162541	4	1.9	0.005	1	0.005	0.005	0.0105379	0.005	0.005	0.005	1
6	1	48	1	128	45	123	197.6	572.175	3	360	1	1	0	Filling & Packing of paints	288	Glazing	24			165	70	25.7117	1	3	80	5.8	1	0	0.005	0.005	0.005	0.0540278	4	0.0295467	3	0.0606553	4	0.15923	4	0.7	0.005	1	0.005	0.005	0.005	0.005	0.005	0.005	1
147	0	60	2	122	50	312	234.4	844.711	1	720	8	6	1		#NULL!		#NULL!	HTN		157	66	26.7759	1	2	104	5.8	1	0	0.005	0.005	0.005	0.0795251	4	0.0544701	4	0.0594736	4	0.208469	4	2	0.0263383	4	0.005	0.005	0.005	0.0136784	0.0101022	0.005	1
109	1	39	1	103	46	203	189.6	634.015	5	324	8	5	0	Low Voltage Networks Maintenance	180		#NULL!			174	93	30.7174	3	2	89	5	0	0	0.005	0.005	0.005	0.0823148	4	0.0608416	4	0.0584079	4	0.216564	4	2	0.0182174	3	0.005	0.005	0.005	0.005	0.005	0.005	1
63	1	52	1	137	50	112	209.4	587.961	1	480	28	4	0	Metal Cutting	396	carpenter	24			173	78	26.0617	1	3	90	6	1	0	0.005	0.005	0.005	0.077586	4	0.0605711	4	0.0564162	4	0.209573	4	0.9	0.005	1	0.005	0.005	0.005	0.005	0.005	0.005	1
62	1	62	1	110	40	89	167.8	470.529	3	372	3	3	0	Mixing & Milling	180	Construction	48			165	76	27.9155	1	3	102	6	1	0	0.005	0.005	0.005	0.0588212	4	0.0439109	4	0.055581	4	0.173313	4	1	0.005	1	0.005	0.005	0.005	0.005	0.005	0.005	1
72	1	46	1	69	42	181	147.2	515.767	7	540	8	4	0	Metal Cutting	300	Seller	60	coronary artery disease	ASA, Metoral, Atorvastatin	190	99	27.4238	2	1	120	6.6	1	1	0.005	0.005	0.005	0.063643	4	0.0353413	3	0.0548669	4	0.168851	4	0.8	0.005	1	0.005	0.005	0.005	0.005	0.005	0.005	1
103	1	43	1	98	42	106	161.2	472.547	5	480	14	5	0	High Voltage Networks Maintenance	240		#NULL!	coronary artery disease	ASA	175	63	20.5714	2	2	116	6.2	1	0	0.005	0.005	0.005	0.0559268	4	0.0363108	3	0.0539544	4	0.161192	4	2	0.005	1	0.005	0.005	0.005	0.005	0.005	0.005	1
18	1	49	1	138	48	351	256.2	933.197	3	600	8	1	0	Filling & Packing of paints	192		#NULL!			180	80	24.6914	1	2	94	6	1	0	0.005	0.005	0.005	0.0633852	4	0.0479256	4	0.0530228	4	0.179334	4	0.8	0.005	1	0.005	0.005	0.005	0.005	0.005	0.005	1
46	0	32	1	138	90	82	244.4	637.411	2	84	8	3	0	Quality control of productions in Laboratory	48	Dairy products manufacturing	24			160	62	24.2187	2	2	98	5.7	1	0	0.005	0.005	0.005	0.052797	4	0.0381621	4	0.0478011	4	0.15376	4	0.8	0.005	1	0.005	0.005	0.005	0.005	0.005	0.005	1
59	1	42	1	126	48	365	247	926.313	4	240	8	3	0	Mixing & Milling	24	Seller	120			165	85	31.2213	2	3	99	5.4	0	0	0.005	0.005	0.005	0.0728473	4	0.0732621	4	0.0469712	4	0.208081	4	0.5	0.005	1	0.005	0.005	0.005	0.005	0.005	0.005	1
3	1	43	1	117	53	104	190.8	537.739	2	432	8	1	0	Mixing raw materials & Milling	288		#NULL!	Back Pain	Pain Relievers	175	64	20.898	1	1	113	4.7	1	0	0.005	0.005	0.005	0.0572171	4	0.0325588	3	0.0468982	4	0.151674	4	1	0.005	1	0.005	0.005	0.005	0.005	0.005	0.005	1
9	1	39	1	89	46	65	148	401.583	6	120	8	1	0	Filling & Packing of paints	192		#NULL!			175	67	21.8776	1	3	86	5.7	1	0	0.005	0.005	0.005	0.0519343	3	0.0338282	3	0.0463266	4	0.147089	4	0.9	0.005	1	0.005	0.005	0.005	0.005	0.005	0.005	1
22	1	34	1	111	45	68	169.6	453.615	3	144	1	2	0	Plastic Injection molding	24	Dairy products manufacturing	72			170	95	32.872	1	1	96	5.7	1	0	0.005	0.005	0.005	0.0323819	3	0.005	1	0.0460261	4	0.098408	3	0.7	0.005	1	0.005	0.005	0.005	0.005	0.005	0.005	1
97	1	44	1	105	48	114	175.8	513.689	5	180	8	5	0	Low Voltage Networks Maintenance	120	Electricity Meter installation	24	Depression & Anxiety	Benzodiazepine	180	75	23.1481	1	1	74	5.6	0	0	0.005	0.005	0.005	0.0457508	3	0.025767	3	0.0454259	4	0.131944	3	2	0.005	1	0.005	0.005	0.005	0.005	0.005	0.005	1
8	1	45	1	159	51	246	259.2	835.007	3	240	3	1	0	Mixing raw materials & Milling	204	Tailor	72			170	95	32.872	1	2	107	5.4	1	0	0.005	0.005	0.005	0.0662475	4	0.0546542	4	0.0432952	4	0.179197	4	0.5	0.005	1	0.005	0.005	0.005	0.005	0.005	0.005	1
68	1	38	1	79	48	96	146.2	428.497	7	468	8	4	0	Milling of Metal	144	Petroleum oil Refinery	30			186	65	18.7883	2	2	108	5.2	1	0	0.005	0.005	0.005	0.0462988	3	0.005	1	0.0429336	4	0.109232	3	0.5	0.005	1	0.005	0.005	0.005	0.005	0.005	0.005	1
86	1	36	1	160	37	267	250.4	836.031	5	240	25	5	0	Medium Voltage Networks Maintenance	48	Gas Distributions company operator	120			178	97	30.6148	3	3	95	6	1	0	0.005	0.005	0.005	0.0652922	4	0.0513177	4	0.0427474	4	0.174357	4	2	0.012927	2	0.005	0.005	0.005	0.005	0.005	0.005	1
102	1	44	1	102	35	129	162.8	499.179	5	180	27	5	0	Medium Voltage Networks Maintenance	216		#NULL!	Single Kidney & Hepatitis C		192	98	26.5842	2	1	86	5.9	1	0	0.005	0.005	0.005	0.0464022	3	0.0347637	3	0.0414344	3	0.1376	3	1.8	0.005	1	0.005	0.005	0.005	0.005	0.005	0.005	1
105	1	35	1	99	46	453	235.6	988.435	5	420	5	5	0	High Voltage Networks Maintenance	108	Seller	24			186	95	27.4598	3	2	79	5.6	0	0	0.005	0.005	0.005	0.0724017	4	0.0609549	4	0.0409949	3	0.189351	4	2	0.0224544	4	0.005	0.005	0.005	0.005	0.005	0.005	1
66	1	41	1	128	62	101	210.2	578.777	7	480	8	4	0	Metal Cutting	144	Seller	24			170	82	28.3737	1	3	90	5.1	0	0	0.005	0.005	0.005	0.0514282	3	0.005	1	0.0401384	3	0.111567	3	0.5	0.005	1	0.005	0.005	0.005	0.005	0.005	0.005	1
54	1	32	1	92	42	445	223	951.833	10	324	8	3	0	Mixing & Milling	4	Welding	96			182	97	29.2839	1	3	82	5.5	0	0	0.005	0.005	0.005	0.0543456	4	0.0523266	4	0.0398735	3	0.161546	4	0.8	0.005	1	0.005	0.005	0.005	0.005	0.005	0.005	1
90	1	62	1	89	42	170	165	545.173	5	180	1	5	0	Digging & Cable connection	300	Bakery	120			175	75	24.4898	1	2	150	5.6	1	1	0.005	0.005	0.005	0.0656254	4	0.0450153	4	0.039548	3	0.165189	4	2	0.0117213	2	0.005	0.005	0.005	0.0106057	0.005	0.005	1
107	1	43	1	94	45	161	171.2	550.247	5	204	26	5	0	Repairing of Transformators	24	Seller	60			176	83	26.7949	3	2	78	5.3	0	0	0.005	0.005	0.005	0.0559758	4	0.0333106	3	0.0381437	3	0.14243	4	2	0.0167483	3	0.005	0.005	0.005	0.005	0.005	0.005	1
5	1	48	1	112	43	175	190	606.923	3	240	25	1	0	Mixing raw materials & Milling	264		#NULL!			190	97	26.8698	1	3	96	4.8	0	0	0.005	0.005	0.005	0.0739472	4	0.0560408	4	0.0370447	3	0.182033	4	0.8	0.005	1	0.005	0.005	0.005	0.005	0.005	0.005	1
133	0	67	2	153	73	157	257.4	741.921	1	600	25	6	1		#NULL!		#NULL!	Degenerative joint disease		155	76	31.6337	2	1	114	5.8	1	0	0.005	0.005	0.005	0.0520247	3	0.03722	4	0.036035	3	0.14028	4	2	0.019637	4	0.005	0.005	0.005	0.005	0.005	0.005	1
7	1	40	1	143	46	249	238.8	791.699	4	360	1	1	0	Filling & Packing of paints	120	Paint powder Forming	96	HTN	Losartan	170	75	25.9516	1	1	94	5.6	0	0	0.005	0.005	0.005	0.0532729	4	0.0364033	3	0.0344038	3	0.13908	3	0.9	0.005	1	0.005	0.005	0.005	0.005	0.005	0.005	1
180	1	43	2	73	30	214	145.8	545.589	4	36	14	6	1	Home agency clerk	120		#NULL!			176	103	33.2515	2	3	105	5.1	1	0	0.005	0.005	0.005	0.0633985	4	0.0481268	4	0.033034	3	0.159559	4	2	0.0190308	3	0.005	0.005	0.005	0.005	0.005	0.005	1
191	1	31	2	104	45	368	222.6	873.925	1	384	8	6	0	Repairing of motorcycles	216		#NULL!		Methadone, Clonazepam	165	78	28.6501	1	3	104	5.8	1	0	0.005	0.005	0.005	0.0259628	2	0.0220503	2	0.0330271	3	0.0960402	3	2	0.005	1	0.005	0.005	0.005	0.005	0.005	0.005	1
61	1	37	1	148	59	169	240.8	716.239	1	444	8	3	0	Quality control of productions in Laboratory	108	Supervisor in Automobile assembly	36			175	72	23.5102	1	2	90	6	1	0	0.005	0.005	0.005	0.0400113	3	0.037226	4	0.032994	3	0.125231	3	1	0.005	1	0.005	0.005	0.005	0.005	0.005	0.005	1
71	1	57	1	79	54	42	141.4	363.601	3	228	28	4	0	Metal Cutting	24	Metal working	192			175	65	21.2245	2	2	90	5	0	0	0.005	0.005	0.005	0.0382331	3	0.0263197	3	0.0329799	3	0.112533	3	0.9	0.005	1	0.005	0.005	0.005	0.005	0.005	0.005	1
100	1	35	1	58	30	771	242.2	1321.42	5	240	5	5	0	Medium Voltage Networks Maintenance	144	Welding	48			169	84	29.4107	3	3	81	5.1	0	0	0.005	0.005	0.005	0.0532834	4	0.0386436	4	0.0317203	3	0.138647	3	2	0.0253507	4	0.005	0.005	0.005	0.0132535	0.0124193	0.005	1
50	1	42	1	104	45	128	174.6	524.965	4	240	8	3	0	Mixing & Milling	48	Food products manufacturing	36			172	82	27.7177	1	3	97	5.8	1	0	0.005	0.005	0.005	0.0510479	3	0.0311628	3	0.031464	3	0.128675	3	1.2	0.005	1	0.005	0.005	0.005	0.005	0.005	0.005	1
84	1	33	1	103	44	124	171.8	514.609	5	396	5	5	1	Driving	12	Driver	120			175	74	24.1633	3	3	73	5.7	1	0	0.005	0.005	0.005	0.0428162	3	0.0337887	3	0.0312762	3	0.122881	3	2	0.0115551	2	0.005	0.005	0.005	0.005	0.005	0.005	1
12	1	44	1	111	46	118	180.6	528.585	2	480	8	1	0	Filling & Packing of paints	240		#NULL!			175	70	22.8571	1	3	93	6	1	0	0.005	0.005	0.005	0.0430672	3	0.0235219	3	0.0296356	3	0.111225	3	0.9	0.005	1	0.005	0.005	0.005	0.005	0.005	0.005	1
172	0	32	2	76	41	116	140.2	434.877	1	204	1	6	1		#NULL!	Textile manufacturing	120	Hyperlipidemia, prediabetes	Metformin, Atorvastatine	158	84	33.6485	3	1	93	5.8	1	0	0.005	0.005	0.005	0.0400527	3	0.0227207	2	0.0280074	3	0.105781	3	2	0.005	1	0.005	0.005	0.005	0.005	0.005	0.005	1
99	1	39	1	125	42	164	199.8	618.169	5	480	5	5	0	Repairing of Transformators	180		#NULL!	Gastritis	Ranitidine	186	86	24.8584	3	2	95	5.7	1	0	0.005	0.005	0.005	0.0427086	3	0.0304257	3	0.0278814	3	0.116016	3	2	0.0148939	3	0.005	0.005	0.005	0.005	0.005	0.005	1
110	1	24	1	87	46	94	151.8	439.209	5	120	26	5	0	Low Voltage Networks Maintenance	24	Repair & Maintenance of equipments	48			190	72	19.9446	1	3	77	5.5	0	0	0.005	0.0106382	0.005	0.0233263	2	0.0170944	2	0.02786	3	0.0889188	3	1.9	0.005	1	0.005	0.005	0.005	0.005	0.005	0.005	1
31	1	27	1	120	40	77	175.4	475.781	3	120	1	2	0	Plastic Injection molding	18	Brick making	144			173	98	32.7442	1	3	88	4.7	0	0	0.005	0.005	0.005	0.0382647	3	0.041927	4	0.0266206	3	0.121812	3	0.8	0.005	1	0.005	0.005	0.005	0.005	0.005	0.005	1
170	0	33	2	96	61	128	182.6	543.125	1	60	32	6	1		#NULL!		#NULL!	Depression & Anxiety	Fluoxetine	163	67	25.2174	1	1	83	5.2	0	0	0.005	0.005	0.010192	0.062565	4	0.0724182	4	0.0257666	3	0.180942	4	2	0.0518661	4	0.0175916	0.005	0.005	0.005	0.005	0.0139516	1
58	1	35	1	172	56	151	258.2	737.737	8	12	24	3	0	Packing & Storage	36	Fish husbandary	36			182	83	25.0574	2	1	105	5.9	1	0	0.005	0.005	0.005	0.0379262	3	0.031899	3	0.0256835	3	0.110509	3	1.2	0.005	1	0.005	0.005	0.005	0.005	0.005	0.005	1
13	1	32	1	129	57	198	225.6	710.735	2	384	8	1	0	Mixing raw materials & Milling	144	Car painting	60	Allergy	Cetirizine	163	74	27.852	1	3	87	5.5	0	0	0.005	0.005	0.005	0.034288	3	0.005	1	0.0251568	3	0.0794448	2	0.8	0.005	1	0.005	0.005	0.005	0.005	0.005	0.005	1
187	1	39	2	#NULL!	#NULL!	160	#NULL!	#NULL!	1	300	14	6	1	Driving	180		#NULL!			180	90	27.7778	2	2	118	7.1	1	1	0.005	0.005	0.005	0.0262254	2	0.021329	2	0.0242648	3	0.0868192	3	2	0.005	1	0.005	0.005	0.005	0.005	0.005	0.005	1
70	1	49	1	128	45	85	190	516.923	8	120	11	4	0	Milling of Metal	168	Driver	192			178	65	20.5151	2	2	112	5.8	1	0	0.005	0.005	0.005	0.0328095	3	0.0234921	3	0.0239268	3	0.0952284	3	0.9	0.005	1	0.005	0.005	0.005	0.005	0.005	0.005	1
10	1	39	1	58	23	174	115.8	437.489	4	156	28	1	0	Mixing raw materials & Milling	240		#NULL!			175	92	30.0408	1	2	82	5.9	1	0	0.005	0.005	0.005	0.0382289	3	0.0263085	3	0.0231495	3	0.102687	3	0.9	0.005	1	0.005	0.005	0.005	0.005	0.005	0.005	1
88	1	39	1	110	44	253	204.6	718.065	5	468	5	5	0	High Voltage Networks Maintenance	60	Municipality Worker	60			175	72	23.5102	1	3	74	5.6	0	0	0.005	0.005	0.005	0.0338001	3	0.0217002	2	0.0229108	3	0.0934111	3	1.9	0.005	1	0.005	0.005	0.005	0.005	0.005	0.005	1
112	1	27	1	122	39	129	186.8	553.659	5	336	5	5	0	High Voltage Networks Maintenance	96		#NULL!			185	107	31.2637	1	2	76	5.7	1	0	0.005	0.005	0.005	0.0265156	2	0.0206066	2	0.0218828	3	0.084005	3	2	0.005	1	0.005	0.005	0.005	0.005	0.005	0.005	1
200	0	53	2	137	55	130	218	625.483	1	480	28	6	1		#NULL!		#NULL!	IBS, Hyperlipidemia	Domperidone, Dimethicone	155	75	31.2175	1	1	104	5.6	1	0	0.005	0.005	0.005	0.0313185	2	0.0230721	2	0.0216038	2	0.0909944	3	1.8	0.0323797	4	0.005	0.005	0.005	0.005	0.005	0.005	1
89	1	32	1	84	84	135	195	578.273	5	240	25	5	0	Repairing of Transformators	24	Building Network Operator	96			175	75	24.4898	1	3	76	5.5	0	0	0.005	0.005	0.005	0.0166241	2	0.005	1	0.0215503	2	0.0581744	2	1.9	0.005	1	0.005	0.005	0.005	0.005	0.005	0.005	1
15	0	36	1	121	56	155	208	627.783	8	60	8	1	0	Quality control of paint productions	180		#NULL!			165	65	23.8751	1	2	102	5.8	1	0	0.005	0.005	0.005	0.0371402	3	0.028013	3	0.0213768	2	0.10153	3	1	0.005	1	0.005	0.005	0.005	0.005	0.005	0.005	1
186	0	50	2	140	45	153	215.6	643.035	1	240	1	6	1		#NULL!		#NULL!			155	74	30.8012	1	3	106	5.9	1	0	0.005	0.005	0.005	0.0194045	2	0.0141069	2	0.0213001	2	0.0698114	2	2	0.005	1	0.005	0.005	0.005	0.005	0.005	0.005	1
94	1	34	1	59	33	343	160.6	708.185	5	360	5	5	0	Low Voltage Networks Maintenance	84		#NULL!			175	78	25.4694	1	1	77	5.8	1	0	0.005	0.005	0.005	0.0379122	3	0.0243571	3	0.020825	2	0.0980943	3	2	0.0161156	3	0.005	0.005	0.005	0.005	0.005	0.005	1
79	1	31	1	147	41	143	216.6	635.305	7	24	4	4	0	Engineering	72		#NULL!			175	83	27.102	1	1	90	5.7	1	0	0.005	0.005	0.005	0.0209088	2	0.0240518	3	0.0205061	2	0.0804667	2	1.3	0.005	1	0.005	0.005	0.005	0.005	0.005	0.005	1
131	0	42	2	130	50	129	205.8	596.789	1	312	25	6	1		#NULL!		#NULL!	Bronchiectasis	Salbutamol	163	63	23.7118	1	1	92	5.6	0	0	0.005	0.005	0.005	0.032194	3	0.0270355	3	0.0204283	2	0.0946578	3	2	0.0177297	3	0.005	0.005	0.005	0.005	0.005	0.005	1
85	1	29	1	86	40	141	154.2	491.657	5	120	8	5	0	Repairing of Transformators	84		#NULL!			170	84	29.0657	3	2	68	5.4	0	0	0.005	0.005	0.005	0.0301009	2	0.0201458	2	0.0200759	2	0.0853226	3	2	0.0111887	2	0.005	0.005	0.005	0.005	0.005	0.005	1
135	1	34	2	149	41	158	221.6	661.655	1	420	8	6	1	Office Work	180		#NULL!			163	78	29.3575	1	2	100	5.6	1	0	0.005	0.005	0.005	0.0272577	2	0.024027	3	0.0188474	2	0.0851322	3	2	0.0147261	3	0.005	0.005	0.005	0.005	0.005	0.005	1
83	1	40	1	108	36	135	171	523.793	5	180	26	5	1	Office Work	36	Electrical Dispatching	144	Mitral valve prolapse		183	85	25.3815	1	2	77	5.9	1	0	0.005	0.005	0.005	0.0226016	2	0.013576	2	0.0186268	2	0.0698044	2	2	0.0162142	3	0.005	0.005	0.005	0.005	0.005	0.005	1
108	1	28	1	147	41	245	237	783.613	5	324	5	5	0	Repairing of Transformators	84	Automobil Mechanic	60			168	92	32.5964	2	3	77	5.8	1	0	0.005	0.005	0.005	0.0249957	2	0.0205158	2	0.0175121	2	0.0780236	2	2	0.0119567	2	0.005	0.005	0.005	0.005	0.005	0.005	1
92	1	51	1	146	50	72	210.4	550.231	5	240	3	5	0	Crane Operator	24	Teacher	360			168	72	25.5102	1	1	90	5.7	1	0	0.005	0.005	0.005	0.0397686	3	0.0236638	3	0.0171377	2	0.0955701	3	2	0.010443	2	0.005	0.005	0.005	0.005	0.005	0.005	1
196	0	49	2	57	58	174	149.8	514.669	1	336	1	6	1		#NULL!		#NULL!	Fatty liver, HTN, Hyperlipidemia	Livergol, Atorvastatine,Losartan, Amlodipine	165	93	34.1598	1	2	106	5.6	1	0	0.005	0.005	0.005	0.0225589	2	0.0183947	2	0.0150115	2	0.0709651	2	2	0.0104759	2	0.005	0.005	0.005	0.005	0.005	0.005	1
137	0	38	2	112	56	173	202.6	633.525	1	144	11	6	0	Cooking	84		#NULL!	Hyperthyroidism		160	45	17.5781	1	2	107	6.1	1	0	0.005	0.005	0.005	0.0181171	2	0.0151352	2	0.014656	2	0.0629083	2	2	0.005	1	0.005	0.005	0.005	0.005	0.005	0.005	1
73	1	48	1	87	50	57	148.4	394.491	7	564	8	4	0	Metal Cutting	288		#NULL!			175	65	21.2245	2	1	102	5.6	1	0	0.005	0.005	0.005	0.0142857	1	0.0142857	2	0.0142857	2	0.0578571	2	0.7	0.005	1	0.005	0.005	0.005	0.005	0.005	0.005	1
101	1	30	1	97	70	190	205	655.973	5	360	5	5	0	Medium Voltage Networks Maintenance	60	Papermaking	48			165	70	25.7117	2	3	77	5.3	0	0	0.005	0.005	0.005	0.0230983	2	0.0152503	2	0.01397	2	0.0673186	2	2	0.0101385	2	0.005	0.005	0.005	0.005	0.005	0.005	1
125	0	29	2	115	57	121	196.2	566.997	1	360	8	6	1		#NULL!		#NULL!	Anemia	Folic Acid	163	52	19.5717	1	2	90	5.6	0	0	0.005	0.005	0.005	0.0216588	2	0.0198505	2	0.0139562	2	0.0704655	2	2	0.005	1	0.005	0.005	0.005	0.005	0.005	0.005	1
197	0	45	2	105	52	180	193	618.733	1	300	18	6	1		#NULL!		#NULL!	Depression & Anxiety	Citalopram	160	70	27.3437	1	2	111	5.8	1	0	0.005	0.005	0.005	0.018252	2	0.0103683	2	0.0139024	2	0.0575228	2	2	0.0159519	3	0.005	0.005	0.005	0.005	0.005	0.005	1
106	1	32	1	76	38	183	150.6	525.485	5	396	5	5	0	Repairing of Transformators	24	Low Voltage Networks Maintenance	156			186	94	27.1708	1	1	61	5.5	0	0	0.005	0.005	0.005	0.0154073	1	0.0132843	2	0.0133958	2	0.0570875	2	1.9	0.013237	2	0.005	0.005	0.005	0.005	0.005	0.005	1
163	1	55	2	84	39	188	160.6	553.185	1	504	3	6	1	Office Work	360		#NULL!	coronary artery disease	Atorvastatine, ASA, Losartan, chlorothiazide	176	116	37.4483	2	3	179	9.9	1	1	0.005	0.005	0.005	0.0144545	1	0.0103951	2	0.0133625	2	0.0532121	2	2	0.005	1	0.005	0.005	0.005	0.005	0.005	0.005	1
104	1	31	1	88	44	138	159.6	500.915	5	300	27	5	0	High Voltage Networks Maintenance	60	Welding	96			181	106	32.3555	2	3	69	5.5	0	0	0.005	0.005	0.005	0.0237872	2	0.0182729	2	0.0132116	2	0.0702717	2	1.8	0.005	1	0.005	0.005	0.005	0.005	0.005	0.005	1
111	1	32	1	105	53	122	182.4	536.671	5	360	5	5	0	High Voltage Networks Maintenance	168		#NULL!			187	90	25.7371	2	1	80	6.3	1	0	0.005	0.005	0.005	0.0207112	2	0.0159239	2	0.0123921	2	0.0640272	2	2	0.005	1	0.005	0.005	0.005	0.005	0.005	0.005	1
93	1	36	1	88	36	141	152.2	487.117	5	432	5	5	0	Low Voltage Networks Maintenance	60	Seller	36			175	83	27.102	2	3	81	5.7	1	0	0.005	0.005	0.005	0.0202903	2	0.0142301	2	0.0119422	2	0.0614626	2	2	0.0173171	3	0.005	0.005	0.005	0.005	0.0104313	0.005	1
169	0	24	2	116	41	142	185.4	563.481	1	204	1	6	1		#NULL!		#NULL!			160	70	27.3437	1	1	97	5.7	1	0	0.005	0.005	0.005	0.018852	2	0.0120905	2	0.0118237	2	0.0577663	2	2	0.005	1	0.005	0.005	0.005	0.005	0.005	0.005	1
134	0	38	2	#NULL!	#NULL!	97	#NULL!	#NULL!	2	120	8	6	1		#NULL!		#NULL!	Anemia	Ferrous Sulfate	153	63	26.9127	2	3	105	5.8	1	0	0.005	0.005	0.005	0.0192651	2	0.0125412	2	0.0115599	2	0.0583662	2	2	0.005	1	0.005	0.005	0.005	0.005	0.005	0.005	1
91	1	35	1	157	55	127	237.4	666.521	5	144	8	5	0	Low Voltage Networks Maintenance	84	Seller	84			178	96	30.2992	2	3	84	6	1	0	0.005	0.005	0.005	0.0211833	2	0.0115618	2	0.0114383	2	0.0591834	2	2	0.005	1	0.005	0.005	0.005	0.005	0.005	0.005	1
166	1	21	2	59	42	74	115.8	337.489	1	24	32	6	0	Building Construction	24		#NULL!	Gastritis		160	65	25.3906	3	3	#NULL!	6	1	0	0.005	0.005	0.005	0.0190302	2	0.0124743	2	0.0109764	2	0.0574809	2	2	0.005	1	0.005	0.005	0.005	0.005	0.005	0.005	1
127	0	52	2	163	76	193	277.6	823.775	1	432	1	6	1		#NULL!		#NULL!	HTN, HLP, Fatty Liver	Atorvastatin, Amitriptyline, Pantoprazole, sucralfate, Livergol	164	77	28.6288	1	1	92	6	1	0	0.005	0.005	0.005	0.0139259	1	0.016718	2	0.0108099	2	0.0564537	2	2	0.0135192	2	0.005	0.005	0.005	0.005	0.005	0.005	1
132	0	45	2	87	41	54	138.8	369.699	1	420	1	6	1		#NULL!		#NULL!	Anemia	Ferrous Sulfate	160	78	30.4687	1	1	94	5.5	0	0	0.005	0.005	0.005	0.013695	1	0.0140283	2	0.010294	2	0.0530173	2	2	0.005	1	0.005	0.005	0.005	0.005	0.005	0.005	1
95	1	41	1	108	42	109	171.8	499.609	5	180	20	5	0	Repair & Maintenance of equipments	156	Cleaning Service	60			168	59	20.9042	2	2	85	6.1	1	0	0.005	0.005	0.005	0.0143192	1	0.005	1	0.0100354	2	0.0443546	1	2	0.0160569	3	0.005	0.005	0.005	0.0112018	0.005	0.005	1
19	1	24	1	57	46	110	125	394.373	2	288	8	1	0	Filling paint sprayer	30		#NULL!			168	88	31.1791	1	3	93	5.6	0	0	0.005	0.005	0.005	0.005	1	0.005	1	0.005	1	0.03	1	0.8	0.005	1	0.005	0.005	0.005	0.005	0.005	0.005	1
25	1	31	1	130	58	89	205.8	556.789	3	120	1	2	0	Plastic Injection molding	84	Shoes manufacturing	48	Anxiety	Benzodiazepine	165	80	29.3848	1	3	96	6	1	0	0.005	0.005	0.005	0.005	1	0.005	1	0.005	1	0.03	1	0.6	0.005	1	0.005	0.005	0.005	0.005	0.005	0.005	1
26	1	30	1	242	53	139	322.8	872.379	3	216	8	2	0	Plastic Injection molding	72		#NULL!			168	75	26.5731	1	1	95	5.8	1	0	0.005	0.005	0.005	0.005	1	0.005	1	0.005	1	0.03	1	0.8	0.005	1	0.005	0.005	0.005	0.005	0.005	0.005	1
27	1	33	1	88	40	124	152.8	471.479	3	300	20	2	0	Plastic Injection molding	60	Shoes manufacturing	96			175	81	26.449	1	3	98	5.5	0	0	0.005	0.005	0.005	0.005	1	0.005	1	0.005	1	0.03	1	0.9	0.005	1	0.005	0.005	0.005	0.005	0.005	0.005	1
28	1	25	1	65	32	175	132	475.263	3	300	1	2	0	Plastic Injection molding	12	Dairy products manufacturing	48			175	85	27.7551	1	1	91	4.7	0	0	0.005	0.005	0.005	0.005	1	0.005	1	0.005	1	0.03	1	0.7	0.005	1	0.005	0.005	0.005	0.005	0.005	0.005	1
32	1	24	1	106	56	81	178.2	486.137	3	240	25	2	0	Plastic Injection molding	2	Bakery	108			176	70	22.5981	1	3	102	5.4	1	0	0.005	0.005	0.005	0.005	1	0.005	1	0.005	1	0.03	1	0.7	0.005	1	0.005	0.005	0.005	0.005	0.005	0.005	1
34	1	36	1	89	52	49	150.8	391.939	3	84	3	2	0	Plastic Injection molding	54	Telecommunication Company	84			160	60	23.4375	1	2	92	5.5	0	0	0.005	0.005	0.005	0.005	1	0.005	1	0.005	1	0.03	1	0.8	0.005	1	0.005	0.005	0.005	0.005	0.005	0.005	1
39	1	31	1	109	43	84	168.8	467.799	2	72	22	2	0	Plastic Injection molding	24	Cooking	48			194	85	22.5848	2	3	107	5.5	1	0	0.005	0.005	0.005	0.005	1	0.005	1	0.005	1	0.03	1	0.8	0.005	1	0.005	0.005	0.005	0.005	0.005	0.005	1
41	1	27	1	113	31	76	159.2	438.007	2	24	30	2	0	Plastic Injection molding	120	Farmer	120	DM	Glibenclamide	178	75	23.6713	1	2	148	7.3	1	1	0.005	0.005	0.005	0.005	1	0.005	1	0.005	1	0.03	1	0.7	0.005	1	0.005	0.005	0.005	0.005	0.005	0.005	1
44	1	26	1	100	51	67	164.4	440.811	4	24	4	3	1	Guarding	36	Plastic Injection	12			165	75	27.5482	1	3	80	5.7	1	0	0.005	0.005	0.005	0.005	1	0.005	1	0.005	1	0.03	1	1.1	0.005	1	0.005	0.005	0.005	0.005	0.005	0.005	1
47	1	24	1	86	50	65	149	403.853	6	300	8	3	0	Mixing & Milling	12	Seller	60			175	73	23.8367	1	3	91	5.3	0	0	0.005	0.005	0.005	0.005	1	0.005	1	0.005	1	0.03	1	0.9	0.005	1	0.005	0.005	0.005	0.005	0.005	0.005	1
48	1	34	1	116	48	85	181	496.493	10	12	8	3	0	Repair & Maintenance	6	Installation	168			172	64	21.6333	1	1	89	5.5	0	0	0.005	0.005	0.005	0.005	1	0.005	1	0.005	1	0.03	1	0.7	0.005	1	0.005	0.005	0.005	0.005	0.005	0.005	1
51	1	31	1	115	50	37	172.4	428.971	4	12	22	3	0	Supervisor of production	36	Pesticides formulation	12			182	75	22.6422	1	3	88	5.5	0	0	0.005	0.005	0.005	0.005	1	0.005	1	0.005	1	0.03	1	0.6	0.005	1	0.005	0.005	0.005	0.005	0.005	0.005	1
53	1	30	1	105	44	261	201.2	718.347	4	12	20	3	0	Mixing & Milling	12	Plastic injection	108			176	76	24.5351	1	3	91	5.5	0	0	0.005	0.005	0.005	0.005	1	0.005	1	0.005	1	0.03	1	0.5	0.005	1	0.005	0.005	0.005	0.005	0.005	0.005	1
55	1	27	1	90	46	153	166.6	531.805	10	48	26	3	0	Mixing & Milling	3	Welding	12			175	74	24.1633	1	2	101	6	1	0	0.005	0.005	0.005	0.005	1	0.005	1	0.005	1	0.03	1	0.8	0.005	1	0.005	0.005	0.005	0.005	0.005	0.005	1
57	1	30	1	121	42	150	193	588.733	3	24	25	3	0	Mixing & Milling	18		#NULL!			178	106	33.4554	2	2	98	5.5	0	0	0.005	0.005	0.005	0.005	1	0.005	1	0.005	1	0.03	1	1.1	0.005	1	0.005	0.005	0.005	0.005	0.005	0.005	1
64	1	41	1	106	55	102	181.4	514.401	6	360	2	4	0	Metal Cutting	360		#NULL!			165	82	30.1194	1	3	98	5.4	0	0	0.005	0.005	0.005	0.005	1	0.005	1	0.005	1	0.03	1	0.7	0.005	1	0.005	0.005	0.005	0.005	0.005	0.005	1
67	1	40	1	66	39	70	119	340.753	1	480	8	4	0	Metal Cutting	252		#NULL!			185	98	28.634	2	2	120	7	1	1	0.005	0.005	0.005	0.005	1	0.005	1	0.005	1	0.03	1	0.7	0.005	1	0.005	0.005	0.005	0.005	0.005	0.005	1
74	1	47	1	41	39	109	101.8	340.709	3	156	3	4	0	Casting of Metals	156	Farmer	180			170	67	23.1834	2	1	116	5.7	1	0	0.005	0.005	0.005	0.005	1	0.005	1	0.005	1	0.03	1	0.9	0.005	1	0.005	0.005	0.005	0.005	0.005	0.005	1
75	1	30	1	80	46	154	156.8	510.559	10	48	3	4	0	Casting of Metals	48	Armature Works	144	HTN	Atenolol	180	72	22.2222	1	1	101	5.7	1	0	0.005	0.005	0.005	0.005	1	0.005	1	0.005	1	0.03	1	0.7	0.005	1	0.005	0.005	0.005	0.005	0.005	0.005	1
78	1	42	1	70	37	78	122.6	356.925	3	240	1	4	0	Casting of Metals	312		#NULL!			162	64	24.3865	1	2	108	5.4	1	0	0.005	0.005	0.005	0.005	1	0.005	1	0.005	1	0.03	1	1.1	0.005	1	0.005	0.005	0.005	0.005	0.005	0.005	1
82	1	29	1	102	72	64	186.8	488.659	1	360	8	4	0	Metal Cutting	120		#NULL!	Epilepsy	Carbamazepine	170	64	22.1453	2	2	98	5.4	0	0	0.005	0.005	0.005	0.005	1	0.005	1	0.005	1	0.03	1	0.9	0.005	1	0.005	0.005	0.005	0.005	0.005	0.005	1
150	0	32	2	87	53	80	156	434.743	1	144	1	6	1		#NULL!		#NULL!	Anemia		165	78	28.6501	1	2	95	5.8	1	0	0.005	0.005	0.005	0.005	1	0.005	1	0.005	1	0.03	1	2	0.005	1	0.005	0.005	0.005	0.005	0.005	0.005	1
153	0	41	2	#NULL!	#NULL!	183	#NULL!	#NULL!	1	312	1	6	1		#NULL!		#NULL!	hypothyroidism, Gestational diabetes	Levothyroxine	165	85	31.2213	1	3	106	5	1	0	0.005	0.005	0.005	0.0132532	1	0.01111	2	0.005	1	0.0443632	1	2	0.005	1	0.005	0.005	0.005	0.005	0.005	0.005	1
171	0	25	2	87	40	62	139.4	379.061	1	312	8	6	1		#NULL!		#NULL!			148	56	25.5661	1	2	93	5.1	0	0	0.005	0.005	0.005	0.0139917	1	0.005	1	0.005	1	0.0389917	1	2	0.005	1	0.005	0.005	0.005	0.005	0.005	0.005	1
190	1	27	2	102	39	83	157.6	441.375	8	24	26	6	0	Plastic Injection molding	12		#NULL!			170	58	20.0692	2	3	100	5.6	1	0	0.005	0.005	0.005	0.0143968	1	0.005	1	0.005	1	0.0393968	1	1.6	0.00625	2	0.005	0.005	0.005	0.005	0.005	0.005	1
49	0	28	1	84	50	83	150.6	425.485	10	2	4	3	0	Quality control of productions in Laboratory	1	Chemistry Laboratory	24			160	62	24.2187	1	2	98	5.6	0	0	0.005	0.005	0.005	0.0154333	1	0.005	1	0.005	1	0.0404333	1	1.3	0.005	1	0.005	0.005	0.005	0.005	0.005	0.005	1
42	1	37	1	128	48	146	205.2	612.427	3	240	25	3	0	Cleaning	24	Butcher	84			170	80	27.6817	2	3	106	5	1	0	0.005	0.005	0.005	0.0160823	1	0.005	1	0.005	1	0.0410823	1	1.3	0.005	1	0.005	0.005	0.005	0.005	0.005	0.005	1
168	1	34	2	120	41	125	186	547.843	1	240	1	6	1	Driving	180	Farmer	180			175	90	29.3878	1	1	98	5.6	0	0	0.005	0.005	0.005	0.0162057	2	0.005	1	0.005	1	0.0412057	1	2	0.005	1	0.005	0.005	0.005	0.005	0.005	0.005	1
98	1	30	1	76	38	106	135.2	413.527	5	360	5	5	0	Crane Operator	72	Driver	60			183	79	23.5898	2	2	76	5	0	0	0.005	0.005	0.005	0.0162555	2	0.005	1	0.005	1	0.0412555	1	2	0.005	1	0.005	0.005	0.005	0.005	0.005	0.005	1
198	0	33	2	65	57	43	130.6	340.085	1	408	8	6	1		#NULL!		#NULL!	Ulcerative Colitis	Mesalazine, Asacol, Prednisone	165	64	23.5078	1	1	#NULL!	6	1	0	0.005	0.005	0.005	0.0167249	2	0.005	1	0.005	1	0.0417249	1	1.8	0.0214278	4	0.005	0.005	0.005	0.005	0.005	0.005	1
43	1	39	1	93	30	247	172.4	638.971	10	60	8	3	1	Guarding	36	Automobile Assembly	60			176	75	24.2123	2	3	97	5.7	1	0	0.005	0.005	0.005	0.0219175	2	0.005	1	0.005	1	0.0469175	1	1.1	0.005	1	0.005	0.005	0.005	0.005	0.005	0.005	1
45	1	41	1	90	47	72	151.4	416.301	10	42	26	3	1	Driving	7	Plastic injection	12			176	75	24.2123	1	3	101	5.9	1	0	0.005	0.005	0.005	0.0220084	2	0.005	1	0.005	1	0.0470084	1	1	0.005	1	0.005	0.005	0.005	0.005	0.005	0.005	1
40	1	24	1	89	35	82	140.4	401.331	4	2	24	2	0	Plastic Injection molding	2	Driver	36			174	60	19.8177	1	3	94	5.7	1	0	0.005	0.005	0.005	0.0253555	2	0.005	1	0.005	1	0.0503555	1	0.8	0.005	1	0.005	0.005	0.005	0.005	0.005	0.005	1
76	1	46	1	106	52	161	190.2	593.377	3	120	1	4	0	Casting of Metals	12	Casting	264			170	72	24.9135	1	3	104	5.8	1	0	0.005	0.005	0.005	0.0254073	2	0.005	1	0.005	1	0.0504073	1	0.8	0.005	1	0.005	0.005	0.005	0.005	0.005	0.005	1
56	1	26	1	119	45	400	244	954.503	3	264	1	3	0	Mixing & Milling	3	Paint Forming	12			178	79	24.9337	1	2	83	5.5	0	0	0.005	0.005	0.005	0.0259365	2	0.0213907	2	0.005	1	0.0706605	2	1.2	0.005	1	0.005	0.005	0.005	0.005	0.005	0.005	1
199	0	47	2	111	49	114	182.8	529.579	1	300	3	6	1		#NULL!		#NULL!	Hypothyroidism, Allergy	Levothyroxine, Cetirizine	155	76	31.6337	2	2	110	5.7	1	0	0.005	0.005	0.005	0.0271981	2	0.0190383	2	0.005	1	0.0662364	2	1.1	0.0269038	4	0.005	0.005	0.005	0.005	0.005	0.005	1
20	1	41	1	115	46	161	193.2	600.187	3	144	3	1	0	Raw Material Warehause	168	Metal plating	36	Back Pain	Pain Relievers	167	80	28.6851	1	2	97	5.2	0	0	0.005	0.005	0.005	0.0273682	2	0.005	1	0.005	1	0.0523682	2	0.8	0.005	1	0.005	0.005	0.005	0.005	0.005	0.005	1
69	1	31	1	91	50	248	190.6	681.285	2	120	8	4	0	Metal Cutting	108		#NULL!			189	100	27.9947	1	1	87	5.1	0	0	0.005	0.005	0.005	0.0288992	2	0.005	1	0.005	1	0.0538992	2	0.7	0.005	1	0.005	0.005	0.005	0.005	0.005	0.005	1
38	1	24	1	95	59	97	173.4	491.241	2	72	24	2	0	Plastic Injection molding	18		#NULL!			187	58	16.5861	1	3	92	5.9	1	0	0.005	0.005	0.005	0.0296058	2	0.0307722	3	0.005	1	0.080378	2	0.7	0.005	1	0.005	0.005	0.005	0.005	0.005	0.005	1
52	1	42	1	112	51	76	178.2	481.137	2	108	4	3	0	Filling & Packing of products	144	Pesticides formulation	120			185	98	28.634	1	3	113	7	1	1	0.005	0.005	0.005	0.0334598	3	0.032091	3	0.005	1	0.0855508	3	0.8	0.005	1	0.005	0.005	0.005	0.005	0.005	0.005	1
65	1	43	1	96	36	205	173	598.333	1	300	18	4	0	Metal Cutting	288	Farmer	120	DM	Metformin, Glibenclamide	175	85	27.7551	1	3	159	10.3	1	1	0.005	0.005	0.005	0.0335926	3	0.0255226	3	0.005	1	0.0791152	2	0.8	0.005	1	0.005	0.005	0.005	0.005	0.005	0.005	1
60	1	46	1	91	43	75	149	413.853	6	84	26	3	0	Mixing & Milling	6	Installation	36	DM	Glibenclamide/ Acarbose	185	96	28.0497	2	3	104	12	1	1	0.005	0.005	0.005	0.0338094	3	0.005	1	0.005	1	0.0588094	2	0.8	0.005	1	0.005	0.005	0.005	0.005	0.005	0.005	1
77	1	20	1	80	57	94	155.8	448.289	3	144	3	4	0	Casting of Metals	24	Paint Forming	24			175	60	19.5918	2	2	105	5.3	1	0	0.005	0.005	0.005	0.0339095	3	0.005	1	0.005	1	0.0589095	2	0.8	0.005	1	0.005	0.005	0.005	0.005	0.005	0.005	1
37	1	26	1	76	35	166	144.2	493.957	2	312	8	2	0	Plastic Injection molding	24	Seller	36			178	90	28.4055	1	1	91	4.8	0	0	0.005	0.005	0.005	0.0350489	3	0.0374241	4	0.005	1	0.092473	3	0.8	0.005	1	0.005	0.005	0.005	0.005	0.005	0.005	1
36	1	32	1	94	43	116	160.2	480.277	3	36	1	2	0	Plastic Injection molding	36	House building	72			160	65	25.3906	1	3	95	5.5	0	0	0.005	0.005	0.005	0.0356418	3	0.005	1	0.005	1	0.0606418	2	0.8	0.005	1	0.005	0.005	0.005	0.005	0.005	0.005	1
29	1	38	1	107	48	93	173.6	487.695	2	144	8	2	0	Plastic Injection molding	12	Electrical Panel manufacturing	168			180	85	26.2346	1	2	93	5.9	1	0	0.005	0.005	0.005	0.0366542	3	0.005	1	0.005	1	0.0616542	2	0.6	0.005	1	0.005	0.005	0.005	0.005	0.005	0.005	1
80	1	31	1	104	47	93	169.6	478.615	1	384	8	4	0	Metal Cutting	144		#NULL!	Gastritis	Omeprazole	170	73	25.2595	1	3	91	5.6	0	0	0.005	0.005	0.005	0.0399951	3	0.0235625	3	0.005	1	0.0835576	3	0.9	0.005	1	0.005	0.005	0.005	0.005	0.005	0.005	1
24	1	29	1	127	42	216	212.2	698.317	3	72	25	2	0	Plastic Injection molding	12	Plastic Injection molding	96			167	83	29.7608	1	3	101	5.8	1	0	0.005	0.005	0.005	0.0408731	3	0.0415067	4	0.005	1	0.10238	3	0.9	0.005	1	0.005	0.005	0.005	0.005	0.005	0.005	1
14	1	36	1	133	47	321	244.2	875.957	4	120	1	1	0	Filling paint sprayer	180	Cooking	48	HTN	Losartan	165	70	25.7117	1	2	82	5.9	1	0	0.005	0.005	0.005	0.0438828	3	0.0265743	3	0.005	1	0.0904571	3	0.9	0.005	1	0.005	0.005	0.005	0.005	0.005	0.005	1
33	1	46	1	173	48	173	255.6	753.835	2	144	25	2	0	Plastic Injection molding	24	House building	180			178	78	24.6181	1	3	99	5.8	1	0	0.005	0.005	0.005	0.0500198	3	0.005	1	0.005	1	0.0750198	2	0.6	0.005	1	0.005	0.005	0.005	0.005	0.005	0.005	1
[truncated: 23 more columns]
